# Supplementary material for: Regional delivery of immunosuppression for transplantation of vascularized composite allografts: opportunities near and far
Source: PubMed Central journal article supplement — Ann Transl Med. 2021 Nov;9(22):1635. doi: 10.21037/atm-2021-15 (PMC8667154; doi:10.21037/atm-2021-15), 2021-11
Supplement: atm-09-22-1635-coif.pdf [file atm-09-22-1635-coif.pdf]

## ICMJE DISCLOSURE FORM

Date: Oct 12<sup>th</sup>, 2021

Your Name: Jeffrey L. Platt, M.D.

Manuscript Title: Regional delivery of immunosuppression for transplantation of vascularized composite allografts: opportunities near and far

Manuscript number (if known): ATM-2021-15

In the interest of transparency, we ask you to disclose all relationships/activities/interests listed below that are related to the content of your manuscript. "Related" means any relation with for-profit or not-for-profit third parties whose interests may be affected by the content of the manuscript. Disclosure represents a commitment to transparency and does not necessarily indicate a bias. If you are in doubt about whether to list a relationship/activity/interest, it is preferable that you do so.

The following questions apply to the author's relationships/activities/interests as they relate to the **current manuscript only**.

The author's relationships/activities/interests should be **defined broadly**. For example, if your manuscript pertains to the epidemiology of hypertension, you should declare all relationships with manufacturers of antihypertensive medication, even if that medication is not mentioned in the manuscript.

In item #1 below, report all support for the work reported in this manuscript without time limit. For all other items, the time frame for disclosure is the past 36 months.

|                                                           |                                                                                                                                                                                | Name all entities with whom you have this relationship or indicate none (add rows as needed)            | Specifications/Comments (e.g., if payments were made to you or to your institution) |
|-----------------------------------------------------------|--------------------------------------------------------------------------------------------------------------------------------------------------------------------------------|---------------------------------------------------------------------------------------------------------|-------------------------------------------------------------------------------------|
| <b>Time frame: Since the initial planning of the work</b> |                                                                                                                                                                                |                                                                                                         |                                                                                     |
| 1                                                         | All support for the present manuscript (e.g., funding, provision of study materials, medical writing, article processing charges, etc.)<br><b>No time limit for this item.</b> | National Institutes of Health (AI151588)(USA)                                                           |                                                                                     |
|                                                           |                                                                                                                                                                                | Department of Defense (RT190021)(USA)                                                                   |                                                                                     |
|                                                           |                                                                                                                                                                                |                                                                                                         |                                                                                     |
| <b>Time frame: past 36 months</b>                         |                                                                                                                                                                                |                                                                                                         |                                                                                     |
| 2                                                         | Grants or contracts from any entity (if not indicated in item #1 above).                                                                                                       | RO1AI122369 (Platt PI; Fox PI) Hepatocyte xenografts for treatment of acute liver failure               | Current support, unrelated                                                          |
|                                                           |                                                                                                                                                                                | RO1OD023138 (Piedrahita PI; Platt Co-PI) Immunodeficient pigs for stem cell based regenerative medicine | Current support, unrelated                                                          |
|                                                           |                                                                                                                                                                                | R21 AI159219 (Cascalho PI; Platt PI) TNRSF13B polymorphisms and the control of innate B cell            | Current support, unrelated                                                          |

|    |                                                                                                              |                                                                                              |                            |
|----|--------------------------------------------------------------------------------------------------------------|----------------------------------------------------------------------------------------------|----------------------------|
|    |                                                                                                              | responses – a double edged sword                                                             |                            |
|    |                                                                                                              | W81XWH-18-1-0721 (DoD PRMRP) Mutable vaccines for emerging infectious threats                | Current support, unrelated |
|    |                                                                                                              | Takeda (Millenium Pharm) (Djamali - U Wis PI; Platt and Cascalho - U Mich co-I) IXADES STUDY | Current support, unrelated |
|    |                                                                                                              |                                                                                              |                            |
| 3  | Royalties or licenses                                                                                        | <input checked="" type="checkbox"/> None                                                     |                            |
|    |                                                                                                              |                                                                                              |                            |
|    |                                                                                                              |                                                                                              |                            |
| 4  | Consulting fees                                                                                              | <input checked="" type="checkbox"/> None                                                     |                            |
|    |                                                                                                              |                                                                                              |                            |
|    |                                                                                                              |                                                                                              |                            |
| 5  | Payment or honoraria for lectures, presentations, speakers bureaus, manuscript writing or educational events | UpToDate                                                                                     | unrelated                  |
|    |                                                                                                              | MDPI-IJMS                                                                                    | Editor in chief            |
|    |                                                                                                              |                                                                                              |                            |
| 6  | Payment for expert testimony                                                                                 | <input checked="" type="checkbox"/> None                                                     |                            |
|    |                                                                                                              |                                                                                              |                            |
|    |                                                                                                              |                                                                                              |                            |
| 7  | Support for attending meetings and/or travel                                                                 | <input checked="" type="checkbox"/> None                                                     |                            |
|    |                                                                                                              |                                                                                              |                            |
|    |                                                                                                              |                                                                                              |                            |
| 8  | Patents planned, issued or pending                                                                           | US20090138976                                                                                | unrelated                  |
|    |                                                                                                              | PCT/US04/18859                                                                               | unrelated                  |
|    |                                                                                                              | PCT/US04/012058                                                                              | unrelated                  |
|    |                                                                                                              | US20110107441 A1 and Canada: CA 2558012                                                      | unrelated                  |
|    |                                                                                                              | WO2005086698 A3                                                                              | unrelated                  |
|    |                                                                                                              | US2008003853                                                                                 |                            |
|    |                                                                                                              | PCT/US06/00864                                                                               | unrelated                  |
|    |                                                                                                              | US 8,153,592                                                                                 | unrelated                  |
|    |                                                                                                              | US 34733US1Pro                                                                               | unrelated                  |
|    |                                                                                                              | OTT Ref. No.: 2019-005                                                                       | unrelated                  |
|    |                                                                                                              | OTT Ref. No.: 2020-359                                                                       | unrelated                  |
|    |                                                                                                              | OTT Ref. No.: 2021-077                                                                       | unrelated                  |
|    |                                                                                                              | OTT Ref. No.: 2021-043                                                                       | unrelated                  |
|    |                                                                                                              | OTT Ref. No.: 2021-078                                                                       | unrelated                  |
|    |                                                                                                              | OTT Ref. No.: 2021-498                                                                       | unrelated                  |
|    |                                                                                                              |                                                                                              |                            |
| 9  | Participation on a Data Safety Monitoring Board or Advisory Board                                            | <input checked="" type="checkbox"/> None                                                     |                            |
|    |                                                                                                              |                                                                                              |                            |
|    |                                                                                                              |                                                                                              |                            |
| 10 |                                                                                                              | <input checked="" type="checkbox"/> None                                                     |                            |

|    |                                                                                                   |                                          |  |
|----|---------------------------------------------------------------------------------------------------|------------------------------------------|--|
|    | Leadership or fiduciary role in other board, society, committee or advocacy group, paid or unpaid |                                          |  |
| 11 | Stock or stock options                                                                            | <input checked="" type="checkbox"/> None |  |
| 12 | Receipt of equipment, materials, drugs, medical writing, gifts or other services                  | <input checked="" type="checkbox"/> None |  |
| 13 | Other financial or non-financial interests                                                        | <input checked="" type="checkbox"/> None |  |

**Please summarize the above conflict of interest in the following box:**

I have grant funding related to VCA (W81XWH-20-10943 DoD/CDMRP).

**Please place an "X" next to the following statement to indicate your agreement:**

I certify that I have answered every question and have not altered the wording of any of the questions on this form.

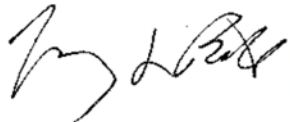

## ICMJE DISCLOSURE FORM

Date: Oct 12<sup>th</sup>, 2021

Your Name: Marilia Cascalho

Manuscript Title: Regional delivery of immunosuppression for transplantation of vascularized composite allografts: opportunities near and far

Manuscript number (if known): ATM-2021-15

In the interest of transparency, we ask you to disclose all relationships/activities/interests listed below that are related to the content of your manuscript. "Related" means any relation with for-profit or not-for-profit third parties whose interests may be affected by the content of the manuscript. Disclosure represents a commitment to transparency and does not necessarily indicate a bias. If you are in doubt about whether to list a relationship/activity/interest, it is preferable that you do so.

The following questions apply to the author's relationships/activities/interests as they relate to the **current manuscript only**.

The author's relationships/activities/interests should be **defined broadly**. For example, if your manuscript pertains to the epidemiology of hypertension, you should declare all relationships with manufacturers of antihypertensive medication, even if that medication is not mentioned in the manuscript.

In item #1 below, report all support for the work reported in this manuscript without time limit. For all other items, the time frame for disclosure is the past 36 months.

|                                                           |                                                                                                                                                                                | Name all entities with whom you have this relationship or indicate none (add rows as needed)                                                                                                                                  | Specifications/Comments (e.g., if payments were made to you or to your institution) |
|-----------------------------------------------------------|--------------------------------------------------------------------------------------------------------------------------------------------------------------------------------|-------------------------------------------------------------------------------------------------------------------------------------------------------------------------------------------------------------------------------|-------------------------------------------------------------------------------------|
| <b>Time frame: Since the initial planning of the work</b> |                                                                                                                                                                                |                                                                                                                                                                                                                               |                                                                                     |
| 1                                                         | All support for the present manuscript (e.g., funding, provision of study materials, medical writing, article processing charges, etc.)<br><b>No time limit for this item.</b> | National Institutes of Health (AI151588)(USA)<br>Department of Defense (RT190021)(USA)                                                                                                                                        |                                                                                     |
| <b>Time frame: past 36 months</b>                         |                                                                                                                                                                                |                                                                                                                                                                                                                               |                                                                                     |
| 2                                                         | Grants or contracts from any entity (if not indicated in item #1 above).                                                                                                       | R21 AI159219 (Cascalho PI; Platt PI) TNRSF13B polymorphisms and the control of innate B cell responses – a double edged sword<br>Takeda (Millenium Pharm) (Djamali - U Wis PI; Platt and Cascalho - U Mich co-I) IXADES STUDY | Current support -unrelated<br><br>Current support -unrelated                        |
| 3                                                         | Royalties or licenses                                                                                                                                                          | <input checked="" type="checkbox"/> None                                                                                                                                                                                      |                                                                                     |

|    |                                                                                                              |                                          |           |
|----|--------------------------------------------------------------------------------------------------------------|------------------------------------------|-----------|
|    |                                                                                                              |                                          |           |
| 4  | Consulting fees                                                                                              | <input checked="" type="checkbox"/> None |           |
|    |                                                                                                              |                                          |           |
| 5  | Payment or honoraria for lectures, presentations, speakers bureaus, manuscript writing or educational events | <input checked="" type="checkbox"/> None |           |
|    |                                                                                                              |                                          |           |
| 6  | Payment for expert testimony                                                                                 | <input checked="" type="checkbox"/> None |           |
|    |                                                                                                              |                                          |           |
| 7  | Support for attending meetings and/or travel                                                                 | <input checked="" type="checkbox"/> None |           |
|    |                                                                                                              |                                          |           |
| 8  | Patents planned, issued or pending                                                                           | US 7776321 B2                            | unrelated |
|    |                                                                                                              | PCT US 011/34733                         | unrelated |
|    |                                                                                                              | Disclosure #2021-01179                   | unrelated |
| 9  | Participation on a Data Safety Monitoring Board or Advisory Board                                            | <input checked="" type="checkbox"/> None |           |
|    |                                                                                                              |                                          |           |
| 10 | Leadership or fiduciary role in other board, society, committee or advocacy group, paid or unpaid            | <input checked="" type="checkbox"/> None |           |
|    |                                                                                                              |                                          |           |
| 11 | Stock or stock options                                                                                       | <input checked="" type="checkbox"/> None |           |
|    |                                                                                                              |                                          |           |
| 12 | Receipt of equipment, materials, drugs, medical writing, gifts or other services                             | <input checked="" type="checkbox"/> None |           |
|    |                                                                                                              |                                          |           |
| 13 | Other financial or non-financial interests                                                                   | <input checked="" type="checkbox"/> None |           |
|    |                                                                                                              |                                          |           |

**Please summarize the above conflict of interest in the following box:**

I have grant funding related to VCA (W81XWH-20-10943 DoD/CDMRP).

Please place an "X" next to the following statement to indicate your agreement:

I certify that I have answered every question and have not altered the wording of any of the questions on this form.

## ICMJE DISCLOSURE FORM

Date: Oct 12<sup>th</sup>, 2021

Your Name: Christina L. Kaufman PhD

Manuscript Title: Regional delivery of immunosuppression for transplantation of vascularized composite allografts: opportunities near and far

Manuscript number (if known): ATM-2021-15

In the interest of transparency, we ask you to disclose all relationships/activities/interests listed below that are related to the content of your manuscript. "Related" means any relation with for-profit or not-for-profit third parties whose interests may be affected by the content of the manuscript. Disclosure represents a commitment to transparency and does not necessarily indicate a bias. If you are in doubt about whether to list a relationship/activity/interest, it is preferable that you do so.

The following questions apply to the author's relationships/activities/interests as they relate to the **current manuscript only**.

The author's relationships/activities/interests should be **defined broadly**. For example, if your manuscript pertains to the epidemiology of hypertension, you should declare all relationships with manufacturers of antihypertensive medication, even if that medication is not mentioned in the manuscript.

In item #1 below, report all support for the work reported in this manuscript without time limit. For all other items, the time frame for disclosure is the past 36 months.

|                                                           |                                                                                                                                                                                | Name all entities with whom you have this relationship or indicate none (add rows as needed) | Specifications/Comments (e.g., if payments were made to you or to your institution) |
|-----------------------------------------------------------|--------------------------------------------------------------------------------------------------------------------------------------------------------------------------------|----------------------------------------------------------------------------------------------|-------------------------------------------------------------------------------------|
| <b>Time frame: Since the initial planning of the work</b> |                                                                                                                                                                                |                                                                                              |                                                                                     |
| 1                                                         | All support for the present manuscript (e.g., funding, provision of study materials, medical writing, article processing charges, etc.)<br><b>No time limit for this item.</b> | <input checked="" type="checkbox"/> None                                                     |                                                                                     |
| <b>Time frame: past 36 months</b>                         |                                                                                                                                                                                |                                                                                              |                                                                                     |
| 2                                                         | Grants or contracts from any entity (if not indicated in item #1 above).                                                                                                       | W81XWH-20-10943<br>DoD/CDMRP                                                                 |                                                                                     |
| 3                                                         | Royalties or licenses                                                                                                                                                          | <input checked="" type="checkbox"/> None                                                     |                                                                                     |
| 4                                                         | Consulting fees                                                                                                                                                                | <input checked="" type="checkbox"/> None                                                     |                                                                                     |
| 5                                                         |                                                                                                                                                                                | <input checked="" type="checkbox"/> None                                                     |                                                                                     |

|    |                                                                                                              |                                                                               |  |
|----|--------------------------------------------------------------------------------------------------------------|-------------------------------------------------------------------------------|--|
|    | Payment or honoraria for lectures, presentations, speakers bureaus, manuscript writing or educational events |                                                                               |  |
| 6  | Payment for expert testimony                                                                                 | <input checked="" type="checkbox"/> None                                      |  |
| 7  | Support for attending meetings and/or travel                                                                 | <input checked="" type="checkbox"/> None                                      |  |
| 8  | Patents planned, issued or pending                                                                           | <input checked="" type="checkbox"/> None                                      |  |
| 9  | Participation on a Data Safety Monitoring Board or Advisory Board                                            | VCA patient review                                                            |  |
| 10 | Leadership or fiduciary role in other board, society, committee or advocacy group, paid or unpaid            | Treasurer of Board, American Society of Reconstructive Transplantation (ASRT) |  |
| 11 | Stock or stock options                                                                                       | <input checked="" type="checkbox"/> None                                      |  |
| 12 | Receipt of equipment, materials, drugs, medical writing, gifts or other services                             | <input checked="" type="checkbox"/> None                                      |  |
| 13 | Other financial or non-financial interests                                                                   | <input checked="" type="checkbox"/> None                                      |  |

**Please summarize the above conflict of interest in the following box:**

I have no personal financial conflicts but I am involved in review of VCA patients and in scientific and clinical societies related to VCA, and have grant funding related to VCA (W81XWH-20-10943 DoD/CDMRP).

**Please place an "X" next to the following statement to indicate your agreement:**

I certify that I have answered every question and have not altered the wording of any of the questions on this form.
